# Supplementary material
Source: MDPI journal article supplement (https://www.mdpi.com/2227-9717/9/11/2085)
Supplement: s1 [file s1]

Supplementary material for “Optimization of ultrasound-assisted extraction of spent coffee grounds oil using response surface methodology”

**Table S1.** Comparison among studies results using common extraction technologies for SCG oil.

| Matrix specifications                                                         | Optimum experimental conditions                                                                                                                                                                                                                      | Max. oil yield            | Key findings (Oil quality parameter excluded)                                                                                                                                                                                                  | Reference |
|-------------------------------------------------------------------------------|------------------------------------------------------------------------------------------------------------------------------------------------------------------------------------------------------------------------------------------------------|---------------------------|------------------------------------------------------------------------------------------------------------------------------------------------------------------------------------------------------------------------------------------------|-----------|
| <b><u>Ultrasound-Assisted Extraction (UAE)</u></b>                            |                                                                                                                                                                                                                                                      |                           |                                                                                                                                                                                                                                                |           |
| Dried SCG ( <i>C. Arabica</i> / <i>C. Robusta</i> blend)<br>PS : 0.315-0.6 mm | US bath<br>Single parameter optimization: L/S (10, 15, 20).<br><i>f</i> : 40 kHz; UP: 400 W; n-hexane; L/S: 20 mLg <sup>-1</sup> ; T: RT; ED: ≈120 min.                                                                                              | ≈14                       | A correlation was remarked between increasing solvent volume and oil yield.                                                                                                                                                                    | [34]      |
| Dried SCG ( <i>C. Arabica</i> )<br>PS: ND                                     | US bath<br>2 <sup>2</sup> factorial design: T (20-60 °C); L/S (2-4 mLg <sup>-1</sup> ).<br><i>f</i> : 40 kHz; UP: 160 W; S: n-hexane; L/S: 4 mLg <sup>-1</sup> ; T: 60 °C; ED: 45 min                                                                | 12 ± 1                    | The ratio had a dominant influence over the temperature in terms of oil yield.<br>Positive interaction effect (Ratio × Temp).                                                                                                                  | [33]      |
| Dried SCG<br>PS: 0.70 mm                                                      | US bath<br>Solvents: n-hexane & petroleum benzene<br>S: n-hexane; L/S: 2 mLg <sup>-1</sup> ; T: RT; ED: 45 min                                                                                                                                       | 13.99<br>(83.83% of 16.7) | No optimization of UAE conditions except the solvent type.<br>Under mild conditions and shorter time, UAE achieves good yield.                                                                                                                 | [35]      |
| Wet SCG ( <i>C. Arabica</i> / <i>C. Robusta</i> blend)<br>PS: ND              | US probe: 1.92-cm diameter ultrasound horn probe<br>L/S (1-2 mLg <sup>-1</sup> ); ED( 5-30 min)<br><i>f</i> :20 kHz ; UP:210 W; S:n-hexane; L/S: 2 mLg <sup>-1</sup> ; T:30°C; ED:30 min                                                             | ≈13                       | Methanol and hexane were used as first and second phase solvents.<br>Ultrasound-assisted two-phase oil extraction extracts 98% of available oil in 30 min.                                                                                     | [47]      |
| Dried SCG ( <i>C. Arabica</i> )                                               | US probe: Q500-20 probe equipped with 1'' diameter tip.<br>Single parameter optimization: L/S (2.5-5 mLg <sup>-1</sup> ); UP (100- 175 w); ED (15-35 min)<br><i>f</i> :20 kHz ; UP:150 W; S:n-hexane; L/S: 4 mLg <sup>-1</sup> ; T:-; ED:30 min      | 14.52                     | N-hexane was determined to be the most effective solvent among chloroform & methanol.<br>UAE diminishes extraction duration and improves oil yield.<br>Direct ultrasonication is more effective than sonication bath (Reference: Rocha study). | [43]      |
| Dried SCG<br>PS: ND                                                           | US probe: Q500-20 probe equipped with 1'' diameter tip.<br>2 <sup>3</sup> factorial design (BBD): UP (100-200 W); L/S (15-30 mLg <sup>-1</sup> ); ED (25-50 min).<br><i>f</i> :20 kHz ; UP:160 W; S:n-hexane; L/S: 30 mLg <sup>-1</sup> ; ED: 34 min | Pre: 17.75<br>Exp: 17.23  | N-hexane extracts more coffee oil compared to chloroform & methanol.<br>13.5 % higher yield offered by ultrasonic probe compared to the standard method.<br>Positive influence of all process parameters.                                      | [40]      |
| <b><u>Supercritical Fluid Extraction (SFE)</u></b>                            |                                                                                                                                                                                                                                                      |                           |                                                                                                                                                                                                                                                |           |
| Dried SCG<br>PS: 0.297 mm                                                     | 2 <sup>3</sup> factorial design (BBD): T (40-60 °C); P (175-225 bar); ED (60-180 min).<br>S: CO <sub>2</sub> , P:200 bar, T:50°C, ED:120 min                                                                                                         | 12.14                     | Positive influence of all optimized parameters.<br>Pressure has the greatest effect among them.                                                                                                                                                | [48]      |
| Dried SCG<br>PS: 0.70 mm                                                      | 2 <sup>3</sup> factorial design (Taguchi): T (40-60 °C); P (200-300 bar); Co-solvent (Water, ethanol, hexane); Co-solvent amount (0-18 ml/100 g)                                                                                                     | 16.4                      | 98.14% of oil content was obtained by SFE.<br>As temperature increases, CO <sub>2</sub> density decreases affecting extraction performance.                                                                                                    | [35]      |

|                                                                               |                                                                                                                                                                                                       |                          |                                                                                                                                                                                                                                          |               |
|-------------------------------------------------------------------------------|-------------------------------------------------------------------------------------------------------------------------------------------------------------------------------------------------------|--------------------------|------------------------------------------------------------------------------------------------------------------------------------------------------------------------------------------------------------------------------------------|---------------|
|                                                                               | S: CO <sub>2</sub> -Ethanol; P:250 bar; T40°C,<br>Ethanol: 18 ml/100 g.                                                                                                                               |                          |                                                                                                                                                                                                                                          |               |
| Dried SCG<br>PS:ND                                                            | Single parameter optimization: T (313 – 328 K); P (15-30 MPa)<br>S: CO <sub>2</sub> P:25 MPa; T:323 K; ED:180 min                                                                                     | 15.4                     | SFE extracted up to 85% of the total amount of oil of SCG.                                                                                                                                                                               | [24]          |
| <b><u>Microwave-Assisted Extraction (MAE)</u></b>                             |                                                                                                                                                                                                       |                          |                                                                                                                                                                                                                                          |               |
| Dried SCG ( <i>C. Arabica</i> / <i>C. Robusta</i> blend)<br>PS : 0.315-0.6 mm | Single parameter optimization: L/S (10, 15, 20)<br>S: n-hexane; L/S: 15 mLg <sup>-1</sup> ; T: RT; ED: 30 min                                                                                         | 17.96                    | MAE was found to be the most effective tool in extracting oil from SCG, among other techniques (SOX, MAC, and UAE).                                                                                                                      | [34]          |
| Dried SCG<br>PS: ND                                                           | Single parameter optimization: L/S (4.16-6.66 mLg <sup>-1</sup> ); T(69-95°C); ED (10-32.5 min)<br>S: n-hexane; L/S: 6.66 mLg <sup>-1</sup> ; T: 95°C; ED: 10 min                                     | 11.54                    | MAE exhibits about 24- fold lower extraction time comparing to SE method.<br>MAE uses less solvent per gram of oil produced.                                                                                                             | [49]          |
| Dried SCG<br>PS: 0.70 mm                                                      | Single parameter optimization: MP (200-800 W); S (n-hexane & petroleum benzene)<br>S: n-hexane; L/S: 2 mLg <sup>-1</sup> ; MP: 800 W; T: RT; ED: 10 min                                               | 13.8<br>(82.63% of 16.7) | Increasing microwave power led to a significant increase in oil yield.<br>The microwave irradiation tool offers a good yield of oil from SCG.                                                                                            | [35]          |
| Dried SCG<br>( <i>C. Arabica</i> / <i>C. Robusta</i> blend)<br>PS : 0.297 mm  | US bath<br>2 <sup>3</sup> factorial design (CCRD): T (26-59 °C); L/S (1-24.82 mLg <sup>-1</sup> ); ED (10.3-115.7 min).<br>UP: 140 W; S: n-hexane; L/S:16 mLg <sup>-1</sup> ; T: 29 °C; ED: 56.6 min. | 11.89 ± 0.17             | Extraction factors were found to have a positive effect on oil yield.<br>The influence of process variables on oil yield can be ranked as follow: Ratio > Time > Temp.<br>Favorable interaction of all optimized factors over oil yield. | Current study |

**PS:** Particle size; **ND:** not defined; *C. Arabica*: Coffee Arabica; *f*: Ultrasonic frequency; **UP:** Ultrasonic power based on amplitude used for probe sonicator; **S:** Solvent; **L/S:** solvent to SCG waste ratio; **T:** temperature; **RT:** Room temperature; **ED:** Extraction duration; **MP:** Microwave power level; **K:** Kelvin; **MPa:** Megapascal; **Pre:** Predicted value; **Exp:** Experimental value; **SOX:** Soxhlet method; **MAC:** Maceration; **BBD:** Box–Behnken design; **CCRD:** Central composite rotatable design.
